# Supplementary material
Source: PubMed Central journal article supplement (PMC3283185)

# Supplementary Figure 1

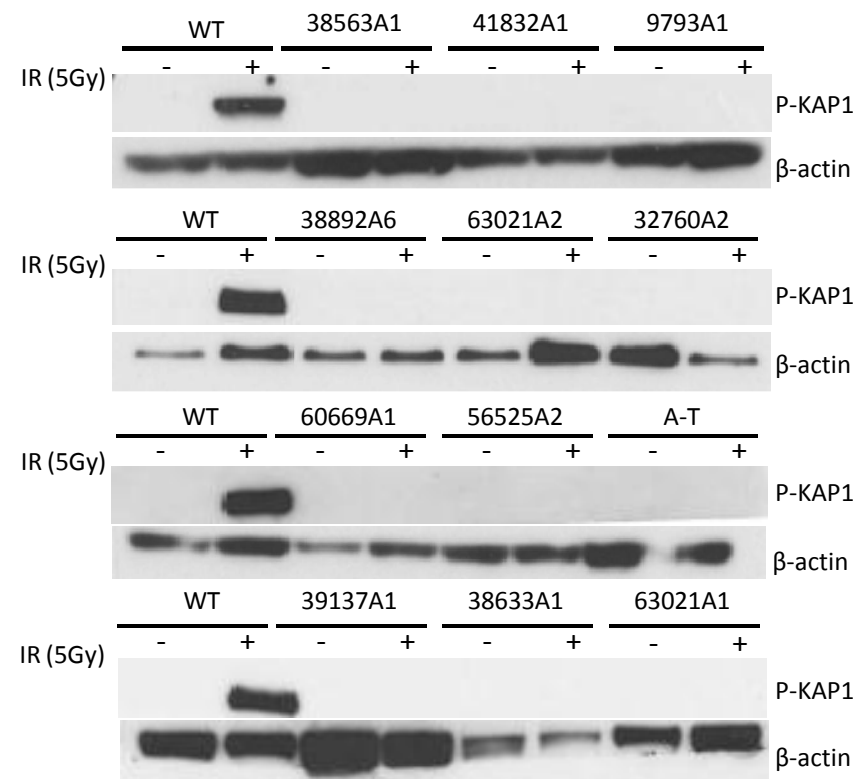

Supplement: ejhg2011196x1.pdf [file ejhg2011196x1.pdf]
